# Supplementary material for: Aloe vera mucilage as a sustainable biopolymer flocculant for efficient arsenate anion removal from water
Source: Royal Society of Chemistry journal article supplement (doi:10.1039/d4su00170b), 2024-01-01
Supplement: d4su00170b1.pdf [file d4su00170b1.pdf]

## **Electronic Supplementary Information (ESI)**

### ***Aloe vera* mucilage as a sustainable biopolymer flocculant for efficient arsenate anion removal from water**

**Deysi J. Venegas-García<sup>1</sup>, Lee D. Wilson<sup>1</sup> and M. De la Cruz-Guzmán<sup>2</sup>**

<sup>1</sup>University of Saskatchewan, Department of Chemistry, 110 Science Place, Thorvaldson Building (Room 165), Saskatoon, Saskatchewan, Canada S7N 5C9.

<sup>2</sup> Universidad Tecnológica de San Luis Potosí, División Industrial, Av. Dr. Arturo Nava Jaimes No. 100, Rancho Nuevo, Soledad de Graciano Sánchez, San Luis Potosí, México C.P. 78340.

\*Corresponding Author: Email: [lee.wilson@usask.ca](mailto:lee.wilson@usask.ca) (L. D. Wilson)

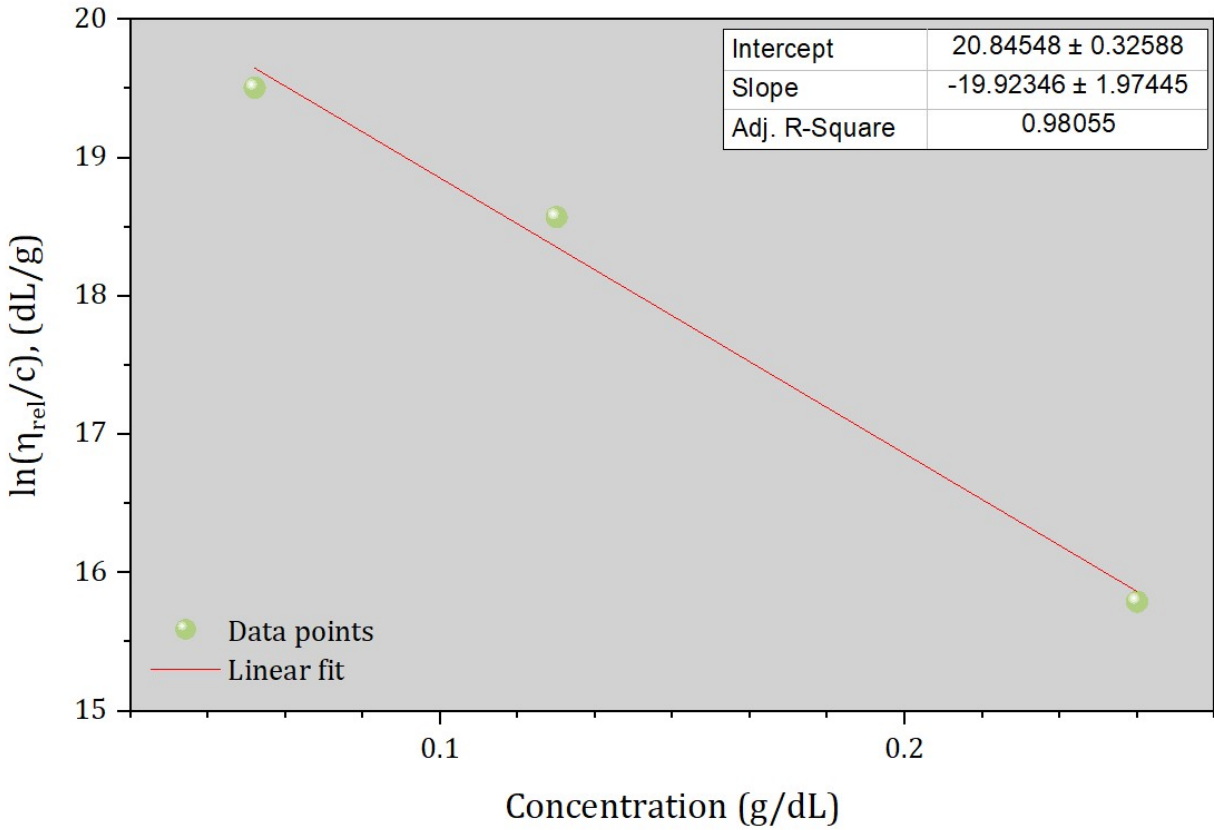

Figure S1: Kraemer's plot for determination of intrinsic viscosity of AVM.

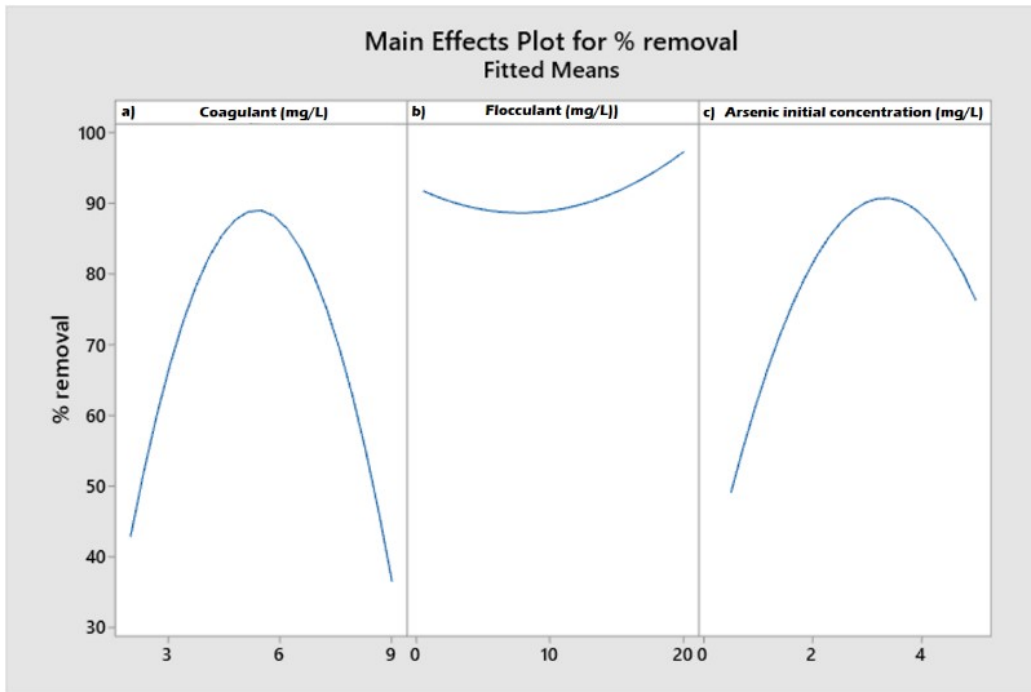

Figure S2: Main effects for the arsenic removal.

**Table S1.** Analysis of Variance (ANOVA)

| Source                    | DF | Adj SS  | Adj MS  | F-Value | P-Value |
|---------------------------|----|---------|---------|---------|---------|
| Model                     | 9  | 26442.2 | 2938.0  | 27.40   | 0.000   |
| Linear                    | 3  | 3247.5  | 1082.5  | 10.10   | 0.000   |
| Coagulant                 | 1  | 156.2   | 156.2   | 1.46    | 0.241   |
| Flocculant                | 1  | 121.0   | 121.0   | 1.13    | 0.301   |
| Initial conc              | 1  | 2970.3  | 2970.3  | 27.70   | 0.000   |
| Square                    | 3  | 22545.7 | 7515.2  | 70.09   | 0.000   |
| Coagulant*Coagulant       | 1  | 17911.8 | 17911.8 | 167.05  | 0.000   |
| Flocculant*Flocculant     | 1  | 223.4   | 223.4   | 2.08    | 0.164   |
| Initial conc*Initial conc | 1  | 5088.5  | 5088.5  | 47.46   | 0.000   |
| 2-Way Interaction         | 3  | 649.0   | 216.3   | 2.02    | 0.144   |
| Coagulant*Flocculant      | 1  | 0.5     | 0.5     | 0.00    | 0.946   |
| Coagulant*Initial conc    | 1  | 648.0   | 648.0   | 6.04    | 0.023   |
| Flocculant*Initial conc   | 1  | 0.5     | 0.5     | 0.00    | 0.946   |
| Error                     | 20 | 2144.5  | 107.2   |         |         |
| Lack-of-Fit               | 3  | 2144.5  | 714.8   | *       | *       |
| Pure Error                | 17 | 0.0     | 0.0     |         |         |
| Total                     | 29 | 28586.7 |         |         |         |

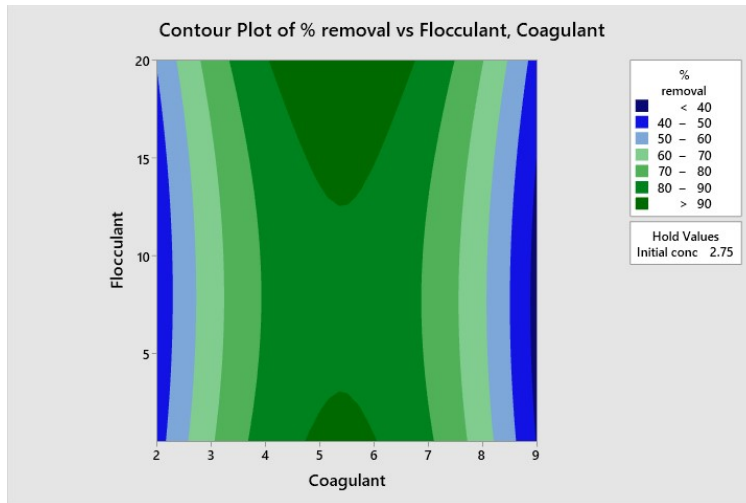

**Figure S3:** Contour Plot of % arsenic removal Flocculant vs coagulant.

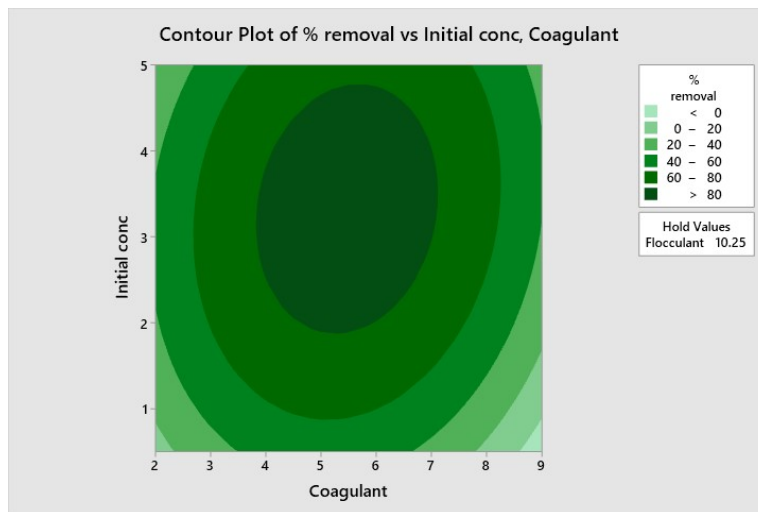

**Figure S4:** Contour Plot of % arsenic removal Initial arsenic concentration vs. coagulant.

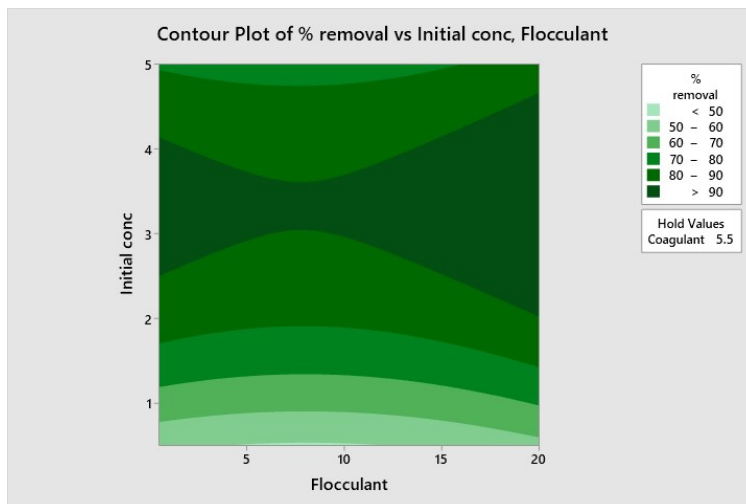

**Figure S5:** Contour Plot of % arsenic removal Initial arsenic concentration vs. flocculant.

**Table S2.** coefficients of the response function for arsenic RE (%).

| Term                        | Coef   | SE Coef | T-Value | P-Value | VIF  |
|-----------------------------|--------|---------|---------|---------|------|
| Constant                    | 89.00  | 4.23    | 21.05   | 0.000   |      |
| Coagulant                   | -3.13  | 2.59    | -1.21   | 0.241   | 1.00 |
| Flocculant                  | 2.75   | 2.59    | 1.06    | 0.301   | 1.00 |
| Initial conc                | 13.63  | 2.59    | 5.26    | 0.000   | 1.00 |
| Coagulant * Coagulant       | -49.25 | 3.81    | -12.92  | 0.000   | 1.01 |
| Flocculant * Flocculant     | 5.50   | 3.81    | 1.44    | 0.164   | 1.01 |
| Initial conc * Initial conc | -26.25 | 3.81    | -6.89   | 0.000   | 1.01 |
| Coagulant * Flocculant      | 0.25   | 3.66    | 0.07    | 0.946   | 1.00 |
| Coagulant * Initial conc    | 9.00   | 3.66    | 2.46    | 0.023   | 1.00 |
| Flocculant * Initial conc   | 0.25   | 3.66    | 0.07    | 0.946   | 1.00 |

| S       | R-sq   | R-sq(adj) | R-sq(pred) |
|---------|--------|-----------|------------|
| 10.3550 | 92.50% | 89.12%    | 80.80%     |

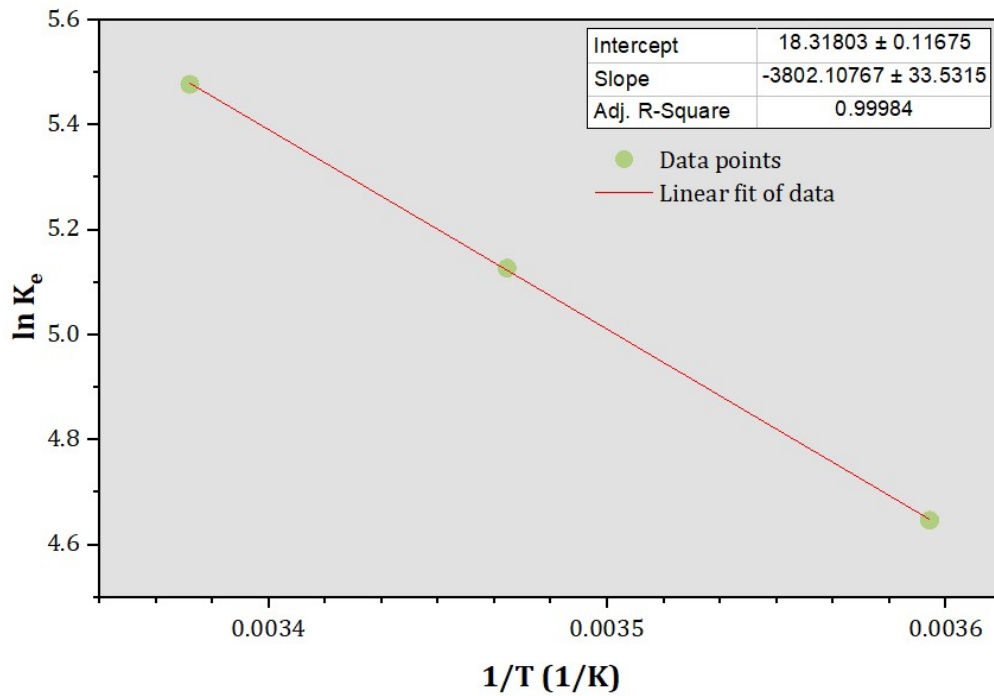

**Figure S6:** van't Hoff plot for thermodynamic parameters of CF-based arsenic removal.

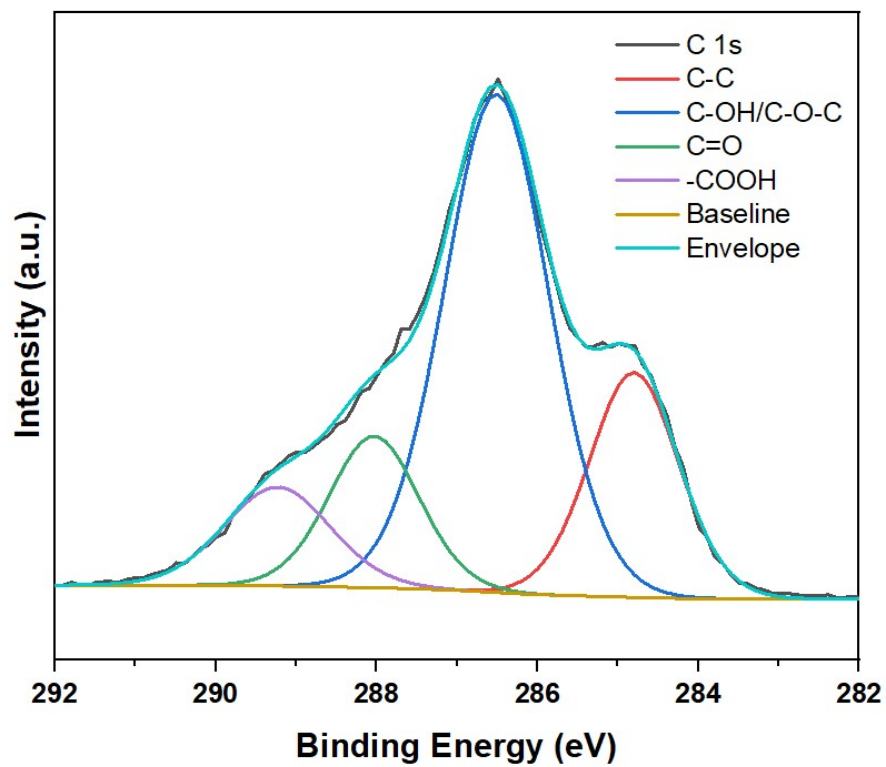

Figure S7: Deconvoluted peaks for C 1s for AVM.

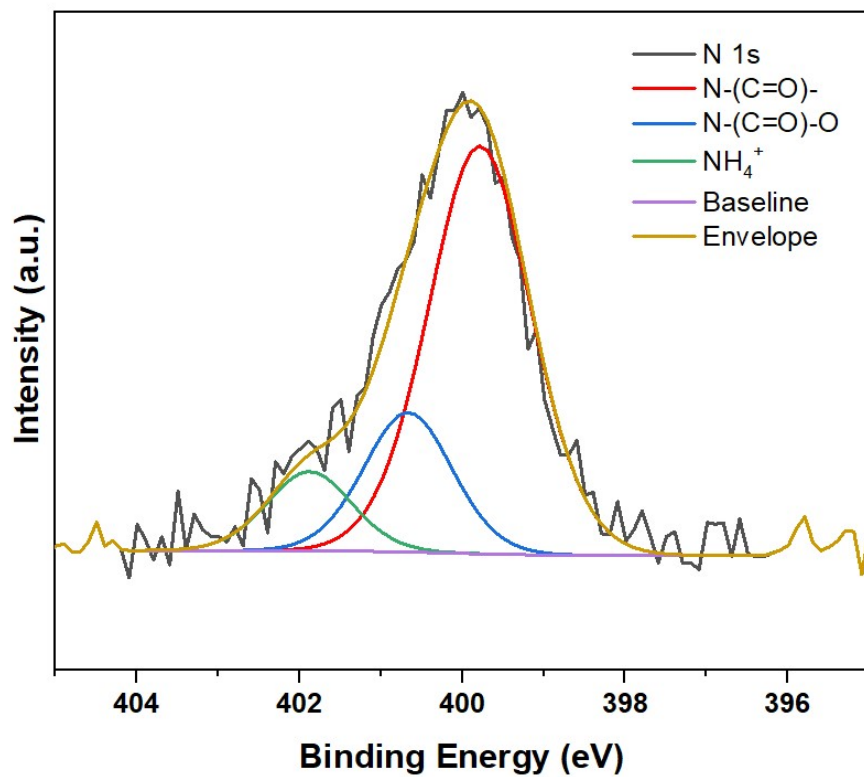

Figure S8: Deconvoluted peaks for N 1s for AVM

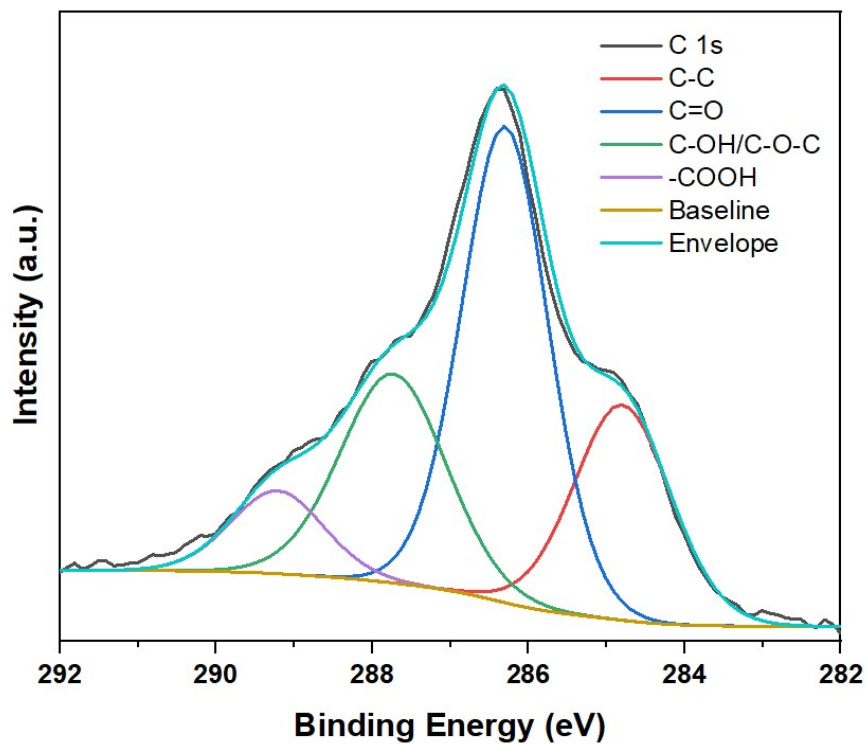

Figure S9: Deconvoluted peaks for C 1s for AVM-As flocs.

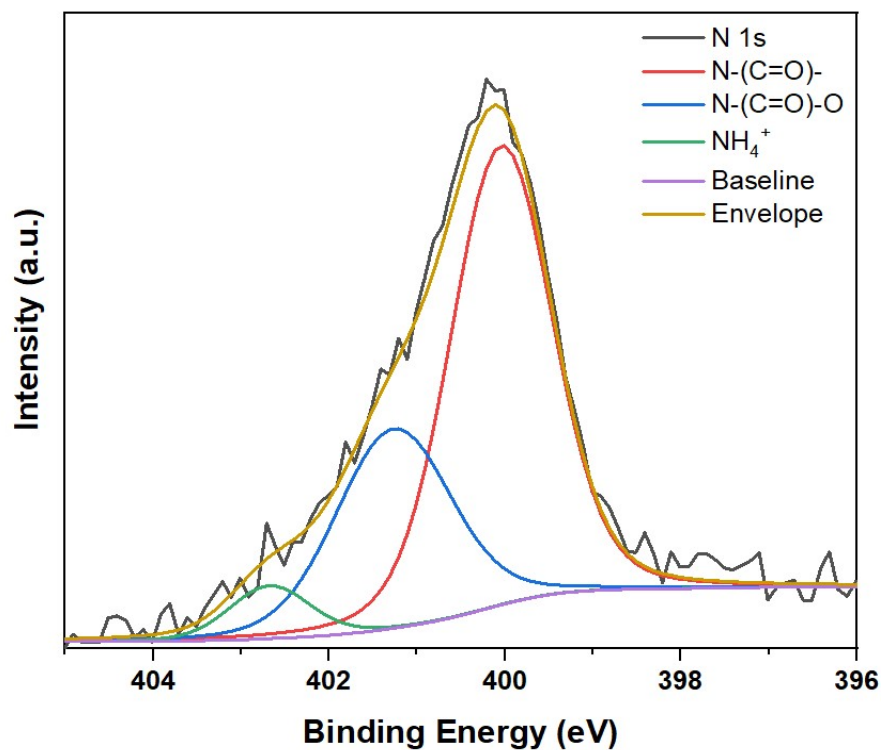

Figure S10: Deconvoluted peaks for N 1s for AVM-As flocs.

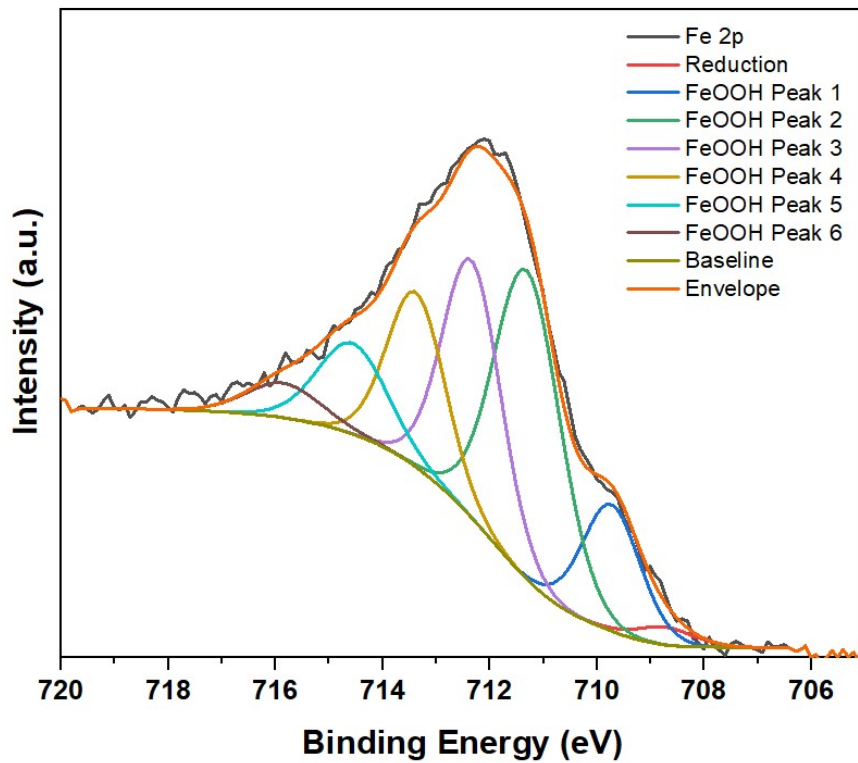

Figure S11: Deconvoluted peaks for Fe 2p for AVM-As flocs.

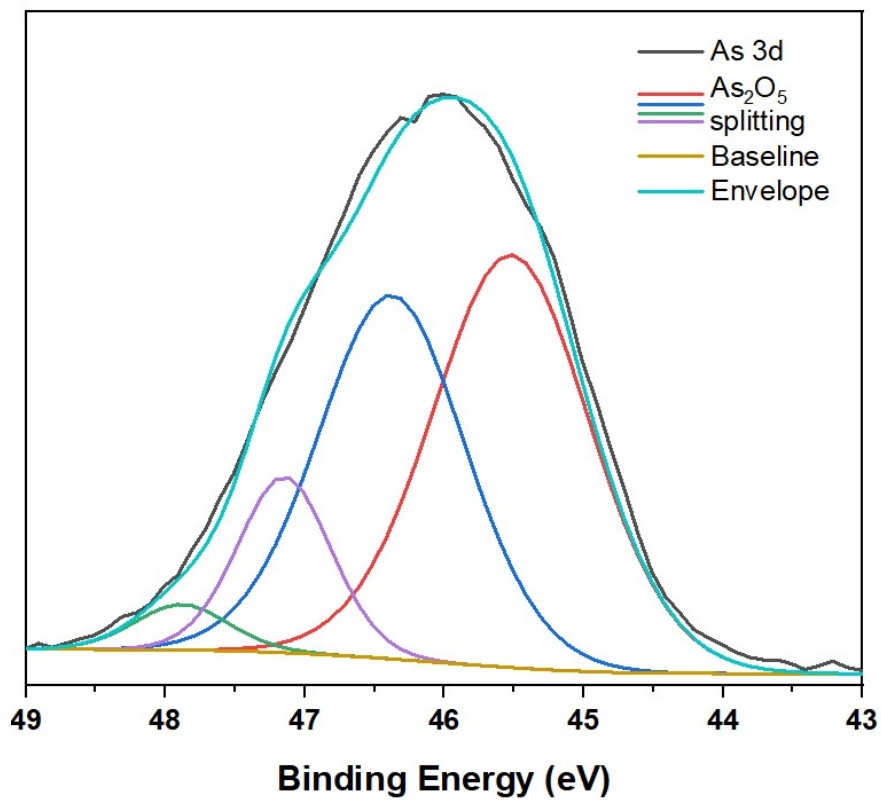

Figure S12: Deconvoluted peaks for As 3d for AVM-As flocs.
